# Supplementary material for: The Traditional Influence on Increasing Acceptance of Commercial Smartphone Applications in Specific Regions of the Arabic World
Source: Hindawi journal article supplement (doi:10.1155/2021/4336772), 2021-01-01
Supplement: f1 [file 4336772.f1.pdf]

# Successful requirement for commercial mobile application for smartphone in Gulf countries

- 1- Age
  - Please mention it (..... )
- 2- Gender
  - Male  Female
- 3- Education level
  - Postgraduate  Diploma or less
  - Undergraduate
- 4- Mobile brand type
  - Samsung Galaxy  Blackberry
  - Motorola or LG  Others (*please mention it*)
  - Apple iPhone  .....
  - HTC
- 5- Number of hours spent on the Internet
  - Less than 10 hours a week  2 - 5 hours a day
  - Less than 2 hours a day  More than 5 hours a day
- 6-
  - Do you use the mobile phone for online purchasing?
    - Yes  No
  - If the previous answer is **yes**, how regularly do you purchase online?
    - Rarely  Once a week
    - Once a month  More than twice a week
- 7- User Internet activities (*tick all that apply*)
  - Social websites (e.g. chatting - Facebook and others - Forums - Messenger)  Commercial websites (stocks - companies - online commercial websites)
  - News websites  Service websites (banks - government agencies - other)
- 8- What are the information sources that help you to make a decision to purchase via mobile phone?
  - Reading from the Internet  Others (*please mention it*)
  - Company reputation  .....
  - Friend advice  .....
- 9- Products types purchased online via mobile phone
  - Electronic devices.
  - Automobile
  - Clothes
  - Furniture
  - Jewellery
  - Beauty and Health

Others ... (please mention)

1. ....
2. ....
3. ....

10- Requirements under consideration: Please choose the scale level of each point in the following table that you think reflects its importance for adoption in commercial mobile applications.

**1 Appearance:** The appearance of Smartphone applications related to M-Commerce and how the exterior design might be attractive in appearance, balanced in appearance, include proper colours and contain texts (11 indicators).

| No.                                                                                                                                                                                                                                                                              | Factors                                                                                             | Strongly agree           | Agree                    | Neither agree nor disagree | Disagree                 | Strongly disagree        |
|----------------------------------------------------------------------------------------------------------------------------------------------------------------------------------------------------------------------------------------------------------------------------------|-----------------------------------------------------------------------------------------------------|--------------------------|--------------------------|----------------------------|--------------------------|--------------------------|
| <b>A. Attractive Appearance and Balancing.</b> Indicators that focus on design innovation, beauty of design, and symmetry in the employment of texts, colours, and images in a smartphone application.                                                                           |                                                                                                     |                          |                          |                            |                          |                          |
| 1.                                                                                                                                                                                                                                                                               | New and innovative design is a fundamental factor to accept and use Smartphone applications         | <input type="checkbox"/> | <input type="checkbox"/> | <input type="checkbox"/>   | <input type="checkbox"/> | <input type="checkbox"/> |
| 2.                                                                                                                                                                                                                                                                               | Design beauty is important to dealing with Smartphone applications                                  | <input type="checkbox"/> | <input type="checkbox"/> | <input type="checkbox"/>   | <input type="checkbox"/> | <input type="checkbox"/> |
| 3.                                                                                                                                                                                                                                                                               | It is fundamental to balance colours, images and text                                               | <input type="checkbox"/> | <input type="checkbox"/> | <input type="checkbox"/>   | <input type="checkbox"/> | <input type="checkbox"/> |
| 4.                                                                                                                                                                                                                                                                               | In balancing colours that are used on the screen interface, one should not be used more than others | <input type="checkbox"/> | <input type="checkbox"/> | <input type="checkbox"/>   | <input type="checkbox"/> | <input type="checkbox"/> |
| 5.                                                                                                                                                                                                                                                                               | Using expressive images instead of using text links only                                            | <input type="checkbox"/> | <input type="checkbox"/> | <input type="checkbox"/>   | <input type="checkbox"/> | <input type="checkbox"/> |
| <b>B. Colour and Text usage.</b> evaluates the colours and texts are used and their consistency with background interfaces. The appropriate number of colours should also be applied to each screen, font size, multiple headlines in one screen, and capital and small letters. |                                                                                                     |                          |                          |                            |                          |                          |
| 6.                                                                                                                                                                                                                                                                               | Using light colours with a dark background and vice versa                                           | <input type="checkbox"/> | <input type="checkbox"/> | <input type="checkbox"/>   | <input type="checkbox"/> | <input type="checkbox"/> |
| 7.                                                                                                                                                                                                                                                                               | The number of colours per screen should be no more than four different colours                      | <input type="checkbox"/> | <input type="checkbox"/> | <input type="checkbox"/>   | <input type="checkbox"/> | <input type="checkbox"/> |
| 8.                                                                                                                                                                                                                                                                               | Use a particular font type to ensure the text is consistent and readable                            | <input type="checkbox"/> | <input type="checkbox"/> | <input type="checkbox"/>   | <input type="checkbox"/> | <input type="checkbox"/> |
| 9.                                                                                                                                                                                                                                                                               | The font sizes are appropriate for the reader                                                       | <input type="checkbox"/> | <input type="checkbox"/> | <input type="checkbox"/>   | <input type="checkbox"/> | <input type="checkbox"/> |
| 10.                                                                                                                                                                                                                                                                              | Use more than one headline per screen                                                               | <input type="checkbox"/> | <input type="checkbox"/> | <input type="checkbox"/>   | <input type="checkbox"/> | <input type="checkbox"/> |
| 11.                                                                                                                                                                                                                                                                              | Avoid using capital letters extensively in normal text in the English language                      | <input type="checkbox"/> | <input type="checkbox"/> | <input type="checkbox"/>   | <input type="checkbox"/> | <input type="checkbox"/> |

**2 Organization:** Good organisation of mobile applications helps to increase quality and performance levels, as well as assist in easy, smooth access to application content and internal links (9 indicators).

| No.                                                                                                                                                                                                                              | Factors                                                                                                                               | Strongly agree           | Agree                    | Neither agree nor disagree | Disagree                 | Strongly disagree        |
|----------------------------------------------------------------------------------------------------------------------------------------------------------------------------------------------------------------------------------|---------------------------------------------------------------------------------------------------------------------------------------|--------------------------|--------------------------|----------------------------|--------------------------|--------------------------|
| <b>A. Application Planning and Consistency:</b> The application should be organized very well, especially with regard to the plan and communication of clarification messages and errors for all inputs, processing, or outputs. |                                                                                                                                       |                          |                          |                            |                          |                          |
| 1.                                                                                                                                                                                                                               | The application name should be meaningful and easy to remember                                                                        | <input type="checkbox"/> | <input type="checkbox"/> | <input type="checkbox"/>   | <input type="checkbox"/> | <input type="checkbox"/> |
| 2.                                                                                                                                                                                                                               | The company logo should be displayed prominently in the application                                                                   | <input type="checkbox"/> | <input type="checkbox"/> | <input type="checkbox"/>   | <input type="checkbox"/> | <input type="checkbox"/> |
| 3.                                                                                                                                                                                                                               | The application should contain map menus to facilitate mobility between the application screens and services                          | <input type="checkbox"/> | <input type="checkbox"/> | <input type="checkbox"/>   | <input type="checkbox"/> | <input type="checkbox"/> |
| 4.                                                                                                                                                                                                                               | It should display the current page title explicitly                                                                                   | <input type="checkbox"/> | <input type="checkbox"/> | <input type="checkbox"/>   | <input type="checkbox"/> | <input type="checkbox"/> |
| 5.                                                                                                                                                                                                                               | The application should be structured and consistent in designing plan of screens.                                                     | <input type="checkbox"/> | <input type="checkbox"/> | <input type="checkbox"/>   | <input type="checkbox"/> | <input type="checkbox"/> |
| 6.                                                                                                                                                                                                                               | The application should be structured and consistent in alert messages, especially in communicating input, process and output messages | <input type="checkbox"/> | <input type="checkbox"/> | <input type="checkbox"/>   | <input type="checkbox"/> | <input type="checkbox"/> |
| <b>B. Navigation links:</b> Smartphone applications should contain easily accessible links, especially for fundamental functions and important processes.                                                                        |                                                                                                                                       |                          |                          |                            |                          |                          |
| 7.                                                                                                                                                                                                                               | It should contain fixed buttons of fundamental functions in most or all of the application's basic screens                            | <input type="checkbox"/> | <input type="checkbox"/> | <input type="checkbox"/>   | <input type="checkbox"/> | <input type="checkbox"/> |
| 8.                                                                                                                                                                                                                               | The fundamental functions should be available and accessible from anywhere in the application                                         | <input type="checkbox"/> | <input type="checkbox"/> | <input type="checkbox"/>   | <input type="checkbox"/> | <input type="checkbox"/> |
| 9.                                                                                                                                                                                                                               | The application keyboard should be turned between numbers and letters depending on input type for each screen                         | <input type="checkbox"/> | <input type="checkbox"/> | <input type="checkbox"/>   | <input type="checkbox"/> | <input type="checkbox"/> |

**3 Content:** Evaluating mobile applications involves the evaluation of information updating procedures across the applications overall and for specific application screens (12 indicators).

| No.                                                                                                                                                                                                                                                                             | Factors                                                                                                                  | Strongly agree           | Agree                    | Neither agree nor disagree | Disagree                 | Strongly disagree        |
|---------------------------------------------------------------------------------------------------------------------------------------------------------------------------------------------------------------------------------------------------------------------------------|--------------------------------------------------------------------------------------------------------------------------|--------------------------|--------------------------|----------------------------|--------------------------|--------------------------|
| <b>A. Updated content:</b> Mobile application content is up-to-date, regular, and time and date update are shown.                                                                                                                                                               |                                                                                                                          |                          |                          |                            |                          |                          |
| 1.                                                                                                                                                                                                                                                                              | Use of an update mechanism to update screen content                                                                      | <input type="checkbox"/> | <input type="checkbox"/> | <input type="checkbox"/>   | <input type="checkbox"/> | <input type="checkbox"/> |
| 2.                                                                                                                                                                                                                                                                              | Application items, such as products and their date of addition, are updated regularly                                    | <input type="checkbox"/> | <input type="checkbox"/> | <input type="checkbox"/>   | <input type="checkbox"/> | <input type="checkbox"/> |
| 3.                                                                                                                                                                                                                                                                              | Show time and date of update when update any item in the application                                                     | <input type="checkbox"/> | <input type="checkbox"/> | <input type="checkbox"/>   | <input type="checkbox"/> | <input type="checkbox"/> |
| 4.                                                                                                                                                                                                                                                                              | Provide information about the company's goals for the application                                                        | <input type="checkbox"/> | <input type="checkbox"/> | <input type="checkbox"/>   | <input type="checkbox"/> | <input type="checkbox"/> |
| <b>B. The Accurate and Relevant Data.</b> It is important to focus on informational content, which should be relevant to the application's goal and to the company's main activities. Also, the Application's published information should be validated and properly referenced |                                                                                                                          |                          |                          |                            |                          |                          |
| 5.                                                                                                                                                                                                                                                                              | Present information about the company's overview, such as company services and activities                                | <input type="checkbox"/> | <input type="checkbox"/> | <input type="checkbox"/>   | <input type="checkbox"/> | <input type="checkbox"/> |
| 6.                                                                                                                                                                                                                                                                              | Information about the products and services being offered by the application                                             | <input type="checkbox"/> | <input type="checkbox"/> | <input type="checkbox"/>   | <input type="checkbox"/> | <input type="checkbox"/> |
| 7.                                                                                                                                                                                                                                                                              | The information should be accurate in content, as well as free of spelling and grammatical errors                        | <input type="checkbox"/> | <input type="checkbox"/> | <input type="checkbox"/>   | <input type="checkbox"/> | <input type="checkbox"/> |
| 8.                                                                                                                                                                                                                                                                              | The information presented should be referenced to its sources, such as policy and legislation                            | <input type="checkbox"/> | <input type="checkbox"/> | <input type="checkbox"/>   | <input type="checkbox"/> | <input type="checkbox"/> |
| <b>C. Content display:</b> Information is presented in an objective manner using different formats.                                                                                                                                                                             |                                                                                                                          |                          |                          |                            |                          |                          |
| 9.                                                                                                                                                                                                                                                                              | Applications should be available to target customers in specific areas                                                   | <input type="checkbox"/> | <input type="checkbox"/> | <input type="checkbox"/>   | <input type="checkbox"/> | <input type="checkbox"/> |
| 10.                                                                                                                                                                                                                                                                             | Application languages should be provided according to the target population                                              | <input type="checkbox"/> | <input type="checkbox"/> | <input type="checkbox"/>   | <input type="checkbox"/> | <input type="checkbox"/> |
| 11.                                                                                                                                                                                                                                                                             | The application should provide and use alternative formats (such as PDF, video and audio) for any unexpected error       | <input type="checkbox"/> | <input type="checkbox"/> | <input type="checkbox"/>   | <input type="checkbox"/> | <input type="checkbox"/> |
| 12.                                                                                                                                                                                                                                                                             | Application information should be presented in an objective manner without any political, cultural or institutional bias | <input type="checkbox"/> | <input type="checkbox"/> | <input type="checkbox"/>   | <input type="checkbox"/> | <input type="checkbox"/> |

**4 Interaction:** Interactive features that increase the user's attention to these applications across multiple means of display, such as text, audio, video, and images, should be included (13 indicators).

| No.                                                                                                                                                                                                                                                                | Factors                                                                                                                                         | Strongly agree           | Agree                    | Neither agree nor disagree | Disagree                 | Strongly disagree        |
|--------------------------------------------------------------------------------------------------------------------------------------------------------------------------------------------------------------------------------------------------------------------|-------------------------------------------------------------------------------------------------------------------------------------------------|--------------------------|--------------------------|----------------------------|--------------------------|--------------------------|
| <b>A. Multimedia adoption:</b> the customers can choose their own mobile applications' services and facilities that can be shown in the application screen such as application colour interface and some of particular buttons are appear and hide others buttons. |                                                                                                                                                 |                          |                          |                            |                          |                          |
| 1.                                                                                                                                                                                                                                                                 | The application should include multimedia elements such as images, video and audio                                                              | <input type="checkbox"/> | <input type="checkbox"/> | <input type="checkbox"/>   | <input type="checkbox"/> | <input type="checkbox"/> |
| 2.                                                                                                                                                                                                                                                                 | Using the previous multimedia elements effectively and put more than one option in each place                                                   | <input type="checkbox"/> | <input type="checkbox"/> | <input type="checkbox"/>   | <input type="checkbox"/> | <input type="checkbox"/> |
| 3.                                                                                                                                                                                                                                                                 | The application should adopt these elements effectively, so as not to affect download time                                                      | <input type="checkbox"/> | <input type="checkbox"/> | <input type="checkbox"/>   | <input type="checkbox"/> | <input type="checkbox"/> |
| <b>B. Adaptability:</b> The provision of features that suit the application's users, such as the ability to customise some options, including colours and interfaces.                                                                                              |                                                                                                                                                 |                          |                          |                            |                          |                          |
| 4.                                                                                                                                                                                                                                                                 | The ability to change or rearrange the application's interface options, such as sorting products in the display screen by name or product price | <input type="checkbox"/> | <input type="checkbox"/> | <input type="checkbox"/>   | <input type="checkbox"/> | <input type="checkbox"/> |
| 5.                                                                                                                                                                                                                                                                 | The ability to display the results horizontally or vertically                                                                                   | <input type="checkbox"/> | <input type="checkbox"/> | <input type="checkbox"/>   | <input type="checkbox"/> | <input type="checkbox"/> |
| 6.                                                                                                                                                                                                                                                                 | Search results can be displayed by customizing and filtering products and services                                                              | <input type="checkbox"/> | <input type="checkbox"/> | <input type="checkbox"/>   | <input type="checkbox"/> | <input type="checkbox"/> |
| 7.                                                                                                                                                                                                                                                                 | The user can choose special displays, such as using different colours in the application background or other services                           | <input type="checkbox"/> | <input type="checkbox"/> | <input type="checkbox"/>   | <input type="checkbox"/> | <input type="checkbox"/> |
| <b>C. Customer advisor:</b> This aspect focuses on services and ads that are sent to customers via mobile applications to attract them to increase their visitation to the application, periodically to attract them to visit the application.                     |                                                                                                                                                 |                          |                          |                            |                          |                          |
| 8.                                                                                                                                                                                                                                                                 | The messages tailor the products offered to customers' personal interests, which will make them want to visit the application periodically      | <input type="checkbox"/> | <input type="checkbox"/> | <input type="checkbox"/>   | <input type="checkbox"/> | <input type="checkbox"/> |
| 9.                                                                                                                                                                                                                                                                 | Messages, recommendations and tips that link to the customers and give them an invitation to buy a particular product                           | <input type="checkbox"/> | <input type="checkbox"/> | <input type="checkbox"/>   | <input type="checkbox"/> | <input type="checkbox"/> |
| 10.                                                                                                                                                                                                                                                                | Personalised ads that reach customers via their personal accounts                                                                               | <input type="checkbox"/> | <input type="checkbox"/> | <input type="checkbox"/>   | <input type="checkbox"/> | <input type="checkbox"/> |
| 11.                                                                                                                                                                                                                                                                | It should use auditory and musical stimuli during any actions or events                                                                         | <input type="checkbox"/> | <input type="checkbox"/> | <input type="checkbox"/>   | <input type="checkbox"/> | <input type="checkbox"/> |
| 12.                                                                                                                                                                                                                                                                | It should use audio symbols to play audio files from the audio files that are prepared for this feature                                         | <input type="checkbox"/> | <input type="checkbox"/> | <input type="checkbox"/>   | <input type="checkbox"/> | <input type="checkbox"/> |

**5 Assurance:** This part emphasises the considerable assurance that should be provided to customers to increase their confidence in the M-Commerce field (13 indicators).

| No. | Factors                                                                                                                                                                                    | Strongly agree           | Agree                    | Neither agree nor disagree | Disagree                 | Strongly disagree        |
|-----|--------------------------------------------------------------------------------------------------------------------------------------------------------------------------------------------|--------------------------|--------------------------|----------------------------|--------------------------|--------------------------|
| 1.  | Various and safe m-payment methods should be provided                                                                                                                                      | <input type="checkbox"/> | <input type="checkbox"/> | <input type="checkbox"/>   | <input type="checkbox"/> | <input type="checkbox"/> |
| 2.  | Safe m-payment methods should be included                                                                                                                                                  | <input type="checkbox"/> | <input type="checkbox"/> | <input type="checkbox"/>   | <input type="checkbox"/> | <input type="checkbox"/> |
| 3.  | It should increasing customer awareness by providing a brief description of the main threats in m-shopping and show how to achieve it through safe and logical solutions                   | <input type="checkbox"/> | <input type="checkbox"/> | <input type="checkbox"/>   | <input type="checkbox"/> | <input type="checkbox"/> |
| 4.  | The security certificates and legitimacy should be provided and presented in a clear place in the application                                                                              | <input type="checkbox"/> | <input type="checkbox"/> | <input type="checkbox"/>   | <input type="checkbox"/> | <input type="checkbox"/> |
| 5.  | It should display the security policy clearly according to countries' legislation                                                                                                          | <input type="checkbox"/> | <input type="checkbox"/> | <input type="checkbox"/>   | <input type="checkbox"/> | <input type="checkbox"/> |
| 6.  | It should present the application companies' pass certification tests from the operating system companies                                                                                  | <input type="checkbox"/> | <input type="checkbox"/> | <input type="checkbox"/>   | <input type="checkbox"/> | <input type="checkbox"/> |
| 7.  | It should develop special passwords for m-shopping applications that can be received via SMS to protect personal client information                                                        | <input type="checkbox"/> | <input type="checkbox"/> | <input type="checkbox"/>   | <input type="checkbox"/> | <input type="checkbox"/> |
| 8.  | It should show customers a certificate that their information that is recorded in the application is confidential                                                                          | <input type="checkbox"/> | <input type="checkbox"/> | <input type="checkbox"/>   | <input type="checkbox"/> | <input type="checkbox"/> |
| 9.  | It should display a privacy policy that clearly shows adherence to government privacy legislation                                                                                          | <input type="checkbox"/> | <input type="checkbox"/> | <input type="checkbox"/>   | <input type="checkbox"/> | <input type="checkbox"/> |
| 10. | It should ensure customer data is not monitored or reserved via temporary files such as cookies                                                                                            | <input type="checkbox"/> | <input type="checkbox"/> | <input type="checkbox"/>   | <input type="checkbox"/> | <input type="checkbox"/> |
| 11. | Information about the organization and website manager should be provided in the application                                                                                               | <input type="checkbox"/> | <input type="checkbox"/> | <input type="checkbox"/>   | <input type="checkbox"/> | <input type="checkbox"/> |
| 12. | Copyright policy to prevent criminals setting up an imitation application should be recorded in the countries where the application operates                                               | <input type="checkbox"/> | <input type="checkbox"/> | <input type="checkbox"/>   | <input type="checkbox"/> | <input type="checkbox"/> |
| 13. | It should increase the credibility of the application's content by providing alternative sources supportive of the application, such as company website, e-mail address and SMS facilities | <input type="checkbox"/> | <input type="checkbox"/> | <input type="checkbox"/>   | <input type="checkbox"/> | <input type="checkbox"/> |

**6 Customer-focus:** Focus on the provision of mechanisms for communicating with customers and discovering customers' reactions to an application (16 indicators).

| No.                                                                                                                                                                                                                                                                                                                 | Factors                                                                                                                                                                                     | Strongly agree           | Agree                    | Neither agree nor disagree | Disagree                 | Strongly disagree        |
|---------------------------------------------------------------------------------------------------------------------------------------------------------------------------------------------------------------------------------------------------------------------------------------------------------------------|---------------------------------------------------------------------------------------------------------------------------------------------------------------------------------------------|--------------------------|--------------------------|----------------------------|--------------------------|--------------------------|
| <b>A. M-loyalty programs:</b> Rewards are offered for retaining customers or acquiring customers.                                                                                                                                                                                                                   |                                                                                                                                                                                             |                          |                          |                            |                          |                          |
| 1.                                                                                                                                                                                                                                                                                                                  | The application should include communication channels for complaints                                                                                                                        | <input type="checkbox"/> | <input type="checkbox"/> | <input type="checkbox"/>   | <input type="checkbox"/> | <input type="checkbox"/> |
| 2.                                                                                                                                                                                                                                                                                                                  | The application should include communication channels for suggestions                                                                                                                       | <input type="checkbox"/> | <input type="checkbox"/> | <input type="checkbox"/>   | <input type="checkbox"/> | <input type="checkbox"/> |
| 3.                                                                                                                                                                                                                                                                                                                  | The application should include communication channels for customer reviews of company services and products                                                                                 | <input type="checkbox"/> | <input type="checkbox"/> | <input type="checkbox"/>   | <input type="checkbox"/> | <input type="checkbox"/> |
| <b>B. The Customer Chat and feedback:</b> The ability to receive the views and suggestions of customers in a timely manner and respond in a timely manner.                                                                                                                                                          |                                                                                                                                                                                             |                          |                          |                            |                          |                          |
| 4.                                                                                                                                                                                                                                                                                                                  | The new customer should be rewarded with a new membership for joining from Mobile application                                                                                               | <input type="checkbox"/> | <input type="checkbox"/> | <input type="checkbox"/>   | <input type="checkbox"/> | <input type="checkbox"/> |
| 5.                                                                                                                                                                                                                                                                                                                  | Customers who contribute to improving company products and services should get gifts via the company application                                                                            | <input type="checkbox"/> | <input type="checkbox"/> | <input type="checkbox"/>   | <input type="checkbox"/> | <input type="checkbox"/> |
| 6.                                                                                                                                                                                                                                                                                                                  | Customers who repeat visits and purchases via mobile application regularly should get gifts                                                                                                 | <input type="checkbox"/> | <input type="checkbox"/> | <input type="checkbox"/>   | <input type="checkbox"/> | <input type="checkbox"/> |
| 7.                                                                                                                                                                                                                                                                                                                  | Assistance through, for instance, online chat and free telephone lines                                                                                                                      | <input type="checkbox"/> | <input type="checkbox"/> | <input type="checkbox"/>   | <input type="checkbox"/> | <input type="checkbox"/> |
| <b>C. Help and technical support:</b> This provides a means of assistance to complete the procurement process through the Smartphone application.                                                                                                                                                                   |                                                                                                                                                                                             |                          |                          |                            |                          |                          |
| 8.                                                                                                                                                                                                                                                                                                                  | It should provide internal search capabilities in the variety of application features                                                                                                       | <input type="checkbox"/> | <input type="checkbox"/> | <input type="checkbox"/>   | <input type="checkbox"/> | <input type="checkbox"/> |
| 9.                                                                                                                                                                                                                                                                                                                  | List of FAQs                                                                                                                                                                                | <input type="checkbox"/> | <input type="checkbox"/> | <input type="checkbox"/>   | <input type="checkbox"/> | <input type="checkbox"/> |
| 10.                                                                                                                                                                                                                                                                                                                 | "How to" information provided in a variety of formats, such as video, audio, and document formats                                                                                           | <input type="checkbox"/> | <input type="checkbox"/> | <input type="checkbox"/>   | <input type="checkbox"/> | <input type="checkbox"/> |
| <b>D. The Credibility and Reliability Build.</b> Providing details of the procurement process helps to raise awareness between the company and its customers via Smartphone applications. Also, the M-Commerce application should be reliable and available in most common versions of Smartphone operating systems |                                                                                                                                                                                             |                          |                          |                            |                          |                          |
| 11.                                                                                                                                                                                                                                                                                                                 | Organise and present the company refund and exchange policies for products                                                                                                                  | <input type="checkbox"/> | <input type="checkbox"/> | <input type="checkbox"/>   | <input type="checkbox"/> | <input type="checkbox"/> |
| 12.                                                                                                                                                                                                                                                                                                                 | The company should design a feature to let their customers track their product shipping until it is delivered                                                                               | <input type="checkbox"/> | <input type="checkbox"/> | <input type="checkbox"/>   | <input type="checkbox"/> | <input type="checkbox"/> |
| 13.                                                                                                                                                                                                                                                                                                                 | The application should design and providing e-receipts, which should be PDF files or mobile messages                                                                                        | <input type="checkbox"/> | <input type="checkbox"/> | <input type="checkbox"/>   | <input type="checkbox"/> | <input type="checkbox"/> |
| 14.                                                                                                                                                                                                                                                                                                                 | Activating policies to handle disputes and allow customers to submit complaints to raise their awareness about matters that should be taken into account during the online shopping process | <input type="checkbox"/> | <input type="checkbox"/> | <input type="checkbox"/>   | <input type="checkbox"/> | <input type="checkbox"/> |
| 15.                                                                                                                                                                                                                                                                                                                 | Offering many versions of the mobile application that are compatible with various Smartphone operating systems                                                                              | <input type="checkbox"/> | <input type="checkbox"/> | <input type="checkbox"/>   | <input type="checkbox"/> | <input type="checkbox"/> |
| 16.                                                                                                                                                                                                                                                                                                                 | Availability and presence 24/7                                                                                                                                                              | <input type="checkbox"/> | <input type="checkbox"/> | <input type="checkbox"/>   | <input type="checkbox"/> | <input type="checkbox"/> |

**7 Systems Quality:** determines the characteristics that should be included as basic requirements in the electronic system (for example, ease of use, system flexibility, system reliability, and learnability). These are examples of qualities that might be evaluated by users of the M-Commerce application system.

| No. | Factors                                                                                                                          | Strongly agree           | Agree                    | Neither agree nor disagree | Disagree                 | Strongly disagree        |
|-----|----------------------------------------------------------------------------------------------------------------------------------|--------------------------|--------------------------|----------------------------|--------------------------|--------------------------|
| 1.  | The M-Commerce application system is easy to use.                                                                                | <input type="checkbox"/> | <input type="checkbox"/> | <input type="checkbox"/>   | <input type="checkbox"/> | <input type="checkbox"/> |
| 2.  | The M-Commerce application system is able to adapt to customer requirements, such as usability, availability, and response time. | <input type="checkbox"/> | <input type="checkbox"/> | <input type="checkbox"/>   | <input type="checkbox"/> | <input type="checkbox"/> |
| 3.  | Commercial mobile applications have real information that can be trusted under specific characteristics of consumer need.        | <input type="checkbox"/> | <input type="checkbox"/> | <input type="checkbox"/>   | <input type="checkbox"/> | <input type="checkbox"/> |

**8 Information Quality:** focuses on the basic output characteristics of the system, which include management reports and information displayed on the screen or web pages (for example, information that should be known because of its importance, completeness, understandability, brevity, accuracy, and timeliness). This lets buyers or suppliers start online transactions and return to reuse them on a regular basis.

| No. | Factors                                                                                    | Strongly agree           | Agree                    | Neither agree nor disagree | Disagree                 | Strongly disagree        |
|-----|--------------------------------------------------------------------------------------------|--------------------------|--------------------------|----------------------------|--------------------------|--------------------------|
| 1.  | The M-Commerce application system provides the precise information needed by the consumer. | <input type="checkbox"/> | <input type="checkbox"/> | <input type="checkbox"/>   | <input type="checkbox"/> | <input type="checkbox"/> |
| 2.  | The information content meets your needs.                                                  | <input type="checkbox"/> | <input type="checkbox"/> | <input type="checkbox"/>   | <input type="checkbox"/> | <input type="checkbox"/> |
| 3.  | The output is reliable.                                                                    | <input type="checkbox"/> | <input type="checkbox"/> | <input type="checkbox"/>   | <input type="checkbox"/> | <input type="checkbox"/> |
| 4.  | The M-Commerce application system provides up-to-date information.                         | <input type="checkbox"/> | <input type="checkbox"/> | <input type="checkbox"/>   | <input type="checkbox"/> | <input type="checkbox"/> |
| 5.  | The M-Commerce application system provides understandable information.                     | <input type="checkbox"/> | <input type="checkbox"/> | <input type="checkbox"/>   | <input type="checkbox"/> | <input type="checkbox"/> |

**9 Service Quality:** involves the features and support that should be provided by the IT support team for the system users (for example, reliability, responsiveness, accuracy, and technical competence). Therefore, its importance is greater than systems quality or information quality for consumers because poor user support will translate into lost customers and lost sales.

| No. | Factors                                                                                                                               | Strongly agree           | Agree                    | Neither agree nor disagree | Disagree                 | Strongly disagree        |
|-----|---------------------------------------------------------------------------------------------------------------------------------------|--------------------------|--------------------------|----------------------------|--------------------------|--------------------------|
| 1.  | When you have a problem, the M-Commerce application system has the appropriate facilities and shows a sincere interest in solving it. | <input type="checkbox"/> | <input type="checkbox"/> | <input type="checkbox"/>   | <input type="checkbox"/> | <input type="checkbox"/> |
| 2.  | The M-Commerce application system is always willing to help you.                                                                      | <input type="checkbox"/> | <input type="checkbox"/> | <input type="checkbox"/>   | <input type="checkbox"/> | <input type="checkbox"/> |
| 3.  | You should feel safe in your transactions with the M-Commerce application system in terms of security and privacy protection.         | <input type="checkbox"/> | <input type="checkbox"/> | <input type="checkbox"/>   | <input type="checkbox"/> | <input type="checkbox"/> |

|    |                                                                               |                          |                          |                          |                          |                          |
|----|-------------------------------------------------------------------------------|--------------------------|--------------------------|--------------------------|--------------------------|--------------------------|
| 4. | The M-Commerce application system has the knowledge to answer your questions. | <input type="checkbox"/> |
| 5. | The M-Commerce application system gives you individual attention.             | <input type="checkbox"/> |
| 6. | The M-Commerce application system understands your specific needs.            | <input type="checkbox"/> |

**10 Intention to Use:** measures visits to mobile applications, navigation within the mobile applications, information retrieval, and execution of a transaction.

| No. | Factors                                                            | Strongly agree           | Agree                    | Neither agree nor disagree | Disagree                 | Strongly disagree        |
|-----|--------------------------------------------------------------------|--------------------------|--------------------------|----------------------------|--------------------------|--------------------------|
| 1.  | You intend to use any M-Commerce application.                      | <input type="checkbox"/> | <input type="checkbox"/> | <input type="checkbox"/>   | <input type="checkbox"/> | <input type="checkbox"/> |
| 2.  | You will reuse the M-Commerce applications in the future.          | <input type="checkbox"/> | <input type="checkbox"/> | <input type="checkbox"/>   | <input type="checkbox"/> | <input type="checkbox"/> |
| 3.  | You will use the M-Commerce applications frequently in the future. | <input type="checkbox"/> | <input type="checkbox"/> | <input type="checkbox"/>   | <input type="checkbox"/> | <input type="checkbox"/> |

**11 User satisfaction:** concerns the level of satisfaction with the information provided in the system. It features information via reports, websites, and support services, such as the tools that can be used to measure user satisfaction.

| No. | Factors                                                      | Strongly agree           | Agree                    | Neither agree nor disagree | Disagree                 | Strongly disagree        |
|-----|--------------------------------------------------------------|--------------------------|--------------------------|----------------------------|--------------------------|--------------------------|
| 1.  | You are satisfied with the M-Commerce application system.    | <input type="checkbox"/> | <input type="checkbox"/> | <input type="checkbox"/>   | <input type="checkbox"/> | <input type="checkbox"/> |
| 2.  | The M-Commerce application system is of high quality.        | <input type="checkbox"/> | <input type="checkbox"/> | <input type="checkbox"/>   | <input type="checkbox"/> | <input type="checkbox"/> |
| 3.  | The M-Commerce application system has met your expectations. | <input type="checkbox"/> | <input type="checkbox"/> | <input type="checkbox"/>   | <input type="checkbox"/> | <input type="checkbox"/> |

**12 Net benefits:** contribute to individual, group, and organisational success (for example, improving the decision-making process, reducing costs, fostering market efficiency, increasing sales, improving productivity, and boosting profits)

| No. | Factors                                                                                                                | Strongly agree           | Agree                    | Neither agree nor disagree | Disagree                 | Strongly disagree        |
|-----|------------------------------------------------------------------------------------------------------------------------|--------------------------|--------------------------|----------------------------|--------------------------|--------------------------|
| 1.  | The product/service of the M-Commerce application system is a good value for the money.                                | <input type="checkbox"/> | <input type="checkbox"/> | <input type="checkbox"/>   | <input type="checkbox"/> | <input type="checkbox"/> |
| 2.  | The price of the product/service of the M-Commerce application system is acceptable.                                   | <input type="checkbox"/> | <input type="checkbox"/> | <input type="checkbox"/>   | <input type="checkbox"/> | <input type="checkbox"/> |
| 3.  | The time spent in the M-Commerce application system is appropriate.                                                    | <input type="checkbox"/> | <input type="checkbox"/> | <input type="checkbox"/>   | <input type="checkbox"/> | <input type="checkbox"/> |
| 4.  | The M-Commerce application system facilities will be extended to your online shopping, thus increasing your purchases. | <input type="checkbox"/> | <input type="checkbox"/> | <input type="checkbox"/>   | <input type="checkbox"/> | <input type="checkbox"/> |
